# Supplementary material for: Stress-induced inflammation evoked by immunogenic cell death is blunted by the IRE1α kinase inhibitor KIRA6 through HSP60 targeting
Source: PubMed Central journal article supplement (PMC8738768; doi:10.1038/s41418-021-00853-5), 2021-08-27
Supplement: 41418_2021_853_MOESM1_ESM.pdf [file 41418_2021_853_MOESM1_ESM.pdf]

## SUPPLEMENTARY INFORMATION

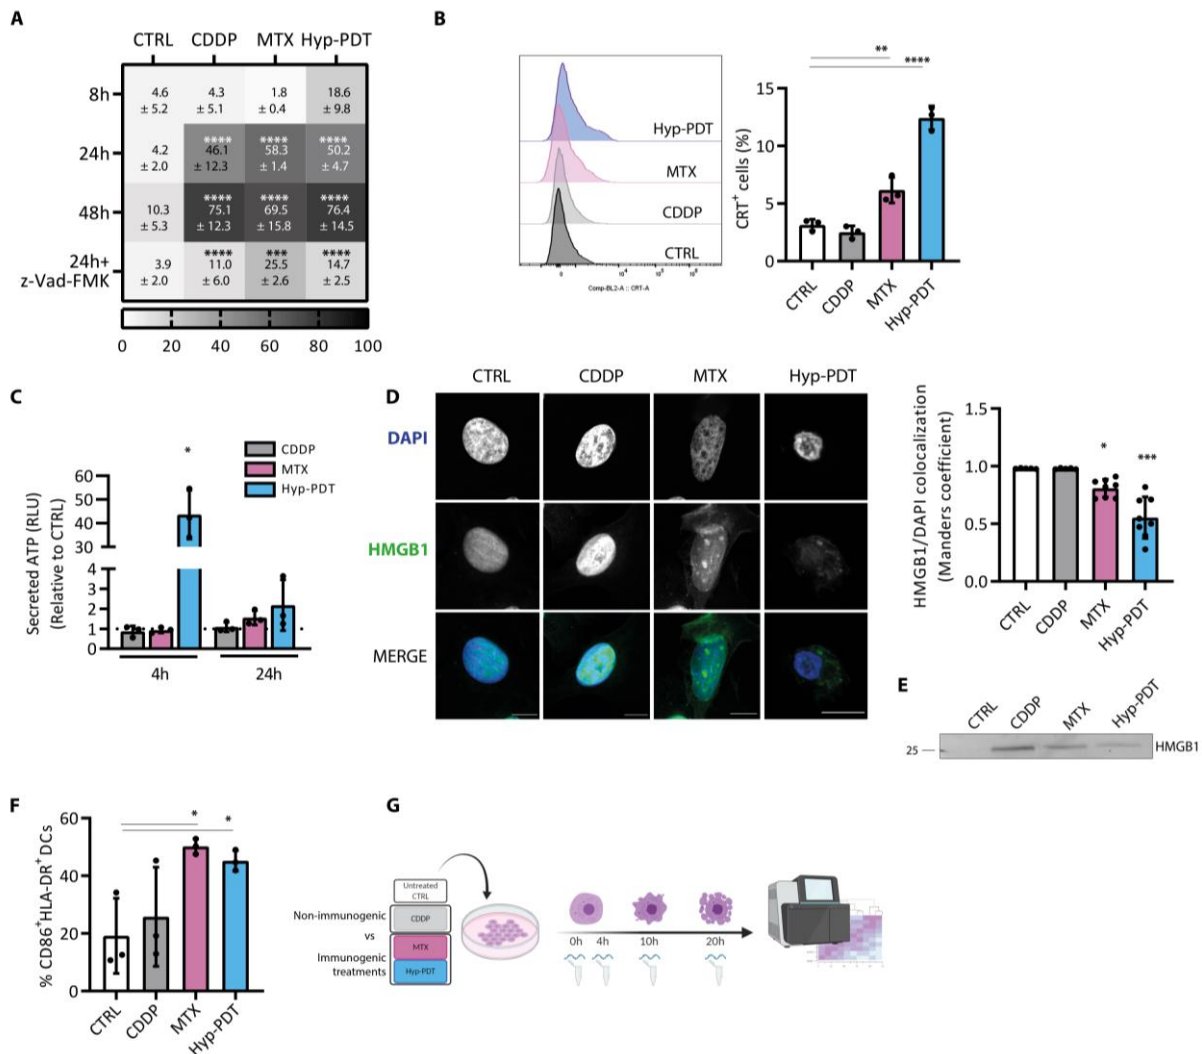

**Supplementary Figure 1** (A) Heatmap summarizing percentage of cell death measured at the indicated time points after treatment of A375 cells with CDDP, MTX or Hyp-PDT detected by the uptake of Sytox Green. The impact of the pan-caspase inhibitor z-Vad-FMK (50  $\mu$ M) on cell death in basal condition or induced by CDDP, MTX, or Hyp-PDT was assessed 24 h after treatment. (B) A375 cells treated with CDDP, MTX, or Hyp-PDT were evaluated for the externalization of CRT in non-permeabilized cells by FACS staining 4 h after treatment. Dead cells were excluded from the analysis. (C) ATP secretion in the medium was measured by luciferase-based assay at the indicated time points after treatment with CDDP, MTX, or Hyp-PDT. (D) Representative confocal microscopy images for the intracellular redistribution of HMGB1 (Green) in A375 cells 16 h after treatment with CDDP, MTX, or Hyp-PDT. Nuclei were counterstained with DAPI (blue). Scale bar: 10  $\mu$ m. Correlation of DAPI and HMGB1 colocalization is analyzed with Manders coefficient. (E) Representative Western Blot for HMGB1 secretion in the medium from A375 24 h after treatment with CDDP, MTX, or Hyp-PDT. (F) Dendritic cell maturation was measured by upregulation of CD86 and HLA-DR by FACS 24 h after coincubation with whole cell lysate of A375 cells treated for 24 h with CDDP, MTX, or Hyp-PDT. (G) Schematic representation of the experimental setup utilized for the RNaseq.

In all graphs values are presented as mean  $\pm$  SD of at least n=3 independent biological replicates. Data is analyzed by two-way ANOVA followed by Dunnett's multiple comparison test in (A), one-way ANOVA followed by Dunnett's multiple comparison test in (B, D, F) and one sample t-test in (C), \*p<0.05, \*\*p<0.01, \*\*\*p<0.001, \*\*\*\*p<0.0001 versus time-matched control, \$p<0.05, \$\$p<0.001 versus time matched-treatment.

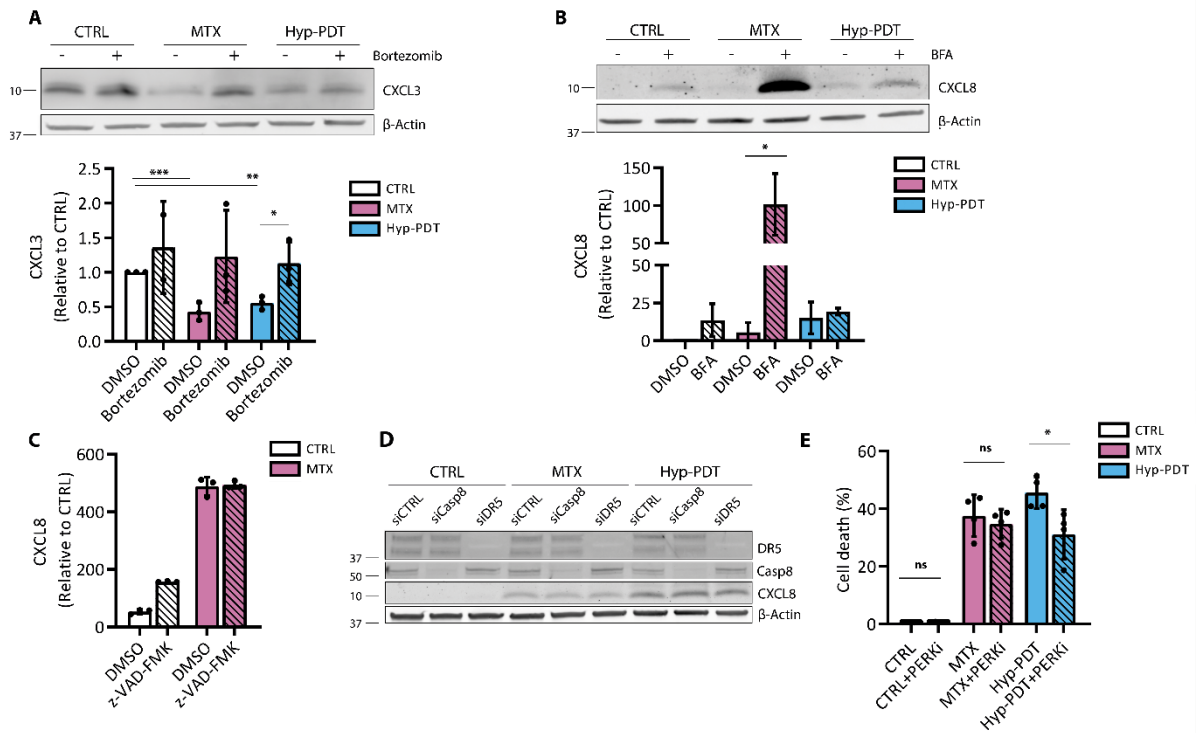

**Supplementary Figure 2 (A)** Intracellular CXCL<sub>3</sub> levels were assessed 8 h after treatment with MTX or Hyp-PDT in the presence or absence of the proteasome inhibitor Bortezomib (150 nM). **(B)** Intracellular CXCL<sub>8</sub> levels were assessed 24 h after treatment with MTX or Hyp-PDT in the presence or absence of Brefeldin A (BFA, 50 ng/ml). **(C)** Extracellular CXCL<sub>8</sub> levels were measured by ELISA in the supernatant of HeLa cells 24 h after treatment with MTX in the presence or absence of z-VAD-FMK (50  $\mu$ M). **(D)** Impact of siDR<sub>5</sub> and siCasp8 on CXCL<sub>8</sub> protein production measured by Western Blot 4h after treatment with MTX or Hyp-PDT compared to scrambled siRNA (siCTRL). **(E)** Cell death was assessed 24 h after treatment with MTX and Hyp-PDT in the presence or absence of PERK inhibitor GSK2606414 (1  $\mu$ M).

In Western Blots  $\beta$ -actin was used as loading control. In all graphs values are presented as mean  $\pm$  SD of at least n=3 independent biological replicates. Data is analyzed by two-tailed Student's t-test in all graphs and One-way ANOVA versus CTRL followed by Dunnett's multiple comparison test in (A), \* $p < 0.05$  \*\* $p < 0.01$ , \*\*\* $p < 0.001$ , ns=not significant.

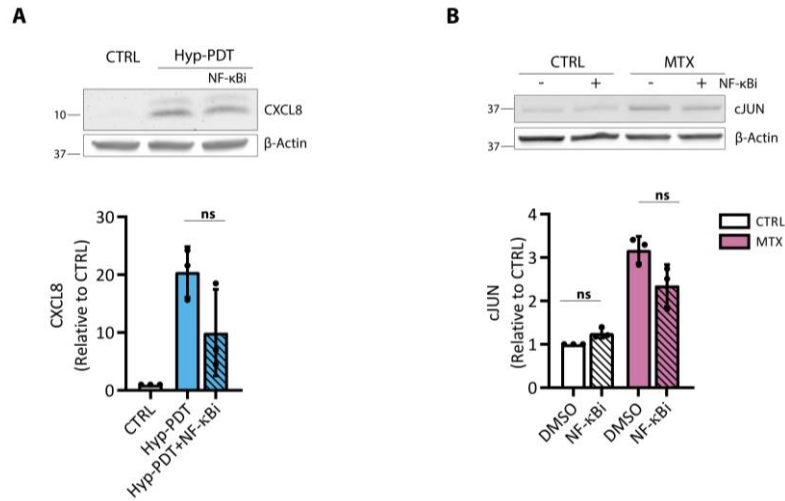

**Supplementary Figure 3 (A)** Intracellular CXCL8 levels were assessed 4 h after treatment with Hyp-PDT in the presence or absence of NF-κB inhibitor BAY11-7082 (10 μM). **(B)** Intracellular levels of cJUN were evaluated 4 h after treatment with MTX in the presence or absence of NF-κB inhibitor BAY11-7082 (10 μM).

In all Western Blots β-actin was used as loading control.

Data is presented as mean ± SD and analyzed by two-tailed Student's t-test, ns=not significant.

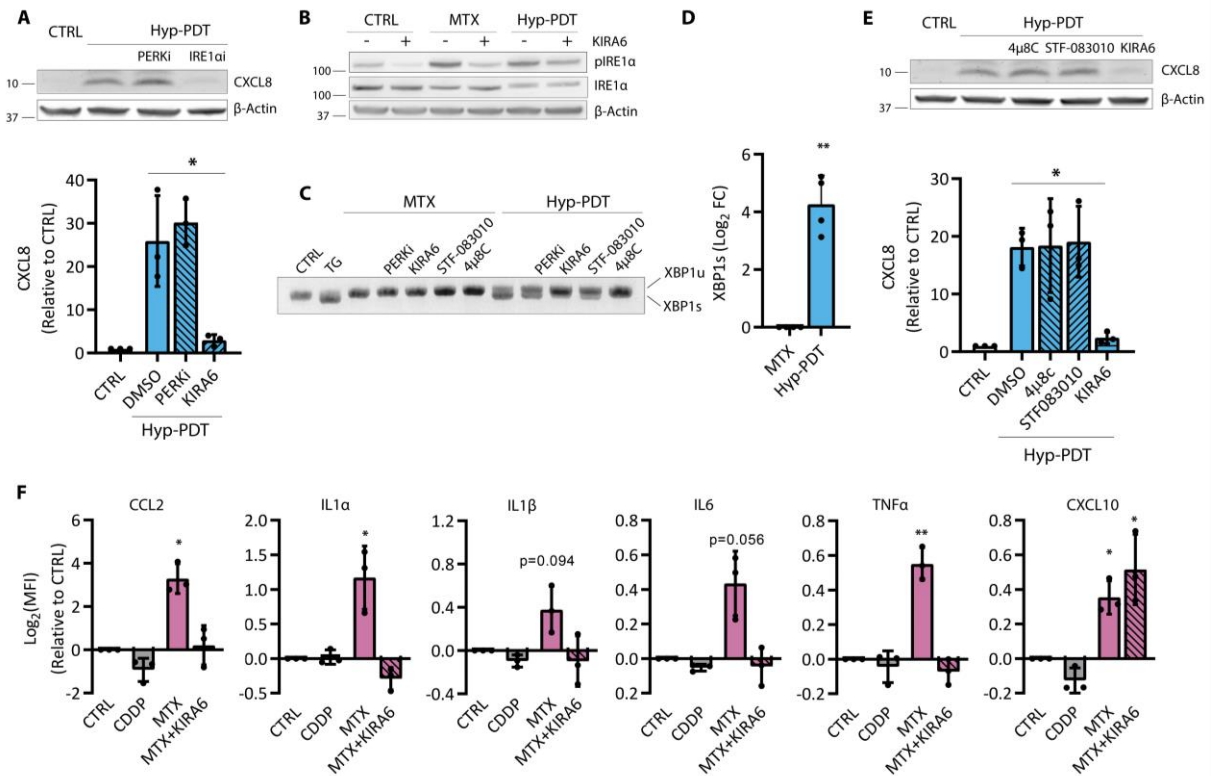

**Supplementary Figure 4** (A) Intracellular CXCL8 levels were assessed 4 h after treatment with Hyp-PDT in the presence or absence of the PERK inhibitor GSK2606414 (1  $\mu$ M) or the IRE1 $\alpha$  inhibitor KIRA6 (1  $\mu$ M). (B) Representative Western blot evaluating the efficacy of the IRE1 $\alpha$  kinase inhibitor KIRA6 (1  $\mu$ M) in inhibiting phosphorylation of IRE1 $\alpha$  and intracellular CXCL8 accumulation 4 h after treatment with MTX or Hyp-PDT. (C) XBP1 splicing assay was performed by PCR 4 h after treatment with MTX or Hyp-PDT in the presence or absence of the PERK inhibitor GSK2606414 (1  $\mu$ M) or the IRE1 $\alpha$  inhibitors 4 $\mu$ 8C (100  $\mu$ M), STF-083010 (50  $\mu$ M) and KIRA6 (1  $\mu$ M). The upper band refers to unspliced XBP1 (XBP1u) and the lower band to spliced XBP1 (XBP1s). Thapsigargin (TG, 2  $\mu$ M) was used as positive control for XBP1 splicing. (D) mRNA levels of cleaved XBP1 (XBP1s) were measured by qPCR in A375 cells 4 h after treatment with MTX or Hyp-PDT. (E) Intracellular CXCL8 levels were assessed 4 h after treatment with Hyp-PDT in the presence or absence of the IRE1 $\alpha$  RNase inhibitors 4 $\mu$ 8C (100  $\mu$ M) and STF-083010 (50  $\mu$ M) and IRE1 $\alpha$  kinase inhibitor KIRA6 (1  $\mu$ M). (F) Cytokines and chemokine secretion in the medium of A375 cells was measured by multiplexed ELISA 24 h after treatment with CDDP or MTX in the presence or absence of KIRA6 (1  $\mu$ M). Data is expressed as log<sub>2</sub> (fold change) of MFI values. In Western Blots  $\beta$ -actin was used as loading control. In all graphs values are presented as mean  $\pm$  SD of at least n=3 independent biological replicates. Data is analyzed by one-way ANOVA followed by Dunnett's multiple comparison test in (A, E) and one-sample t-test in (D, F), \*p<0.05, \*\*p<0.01.

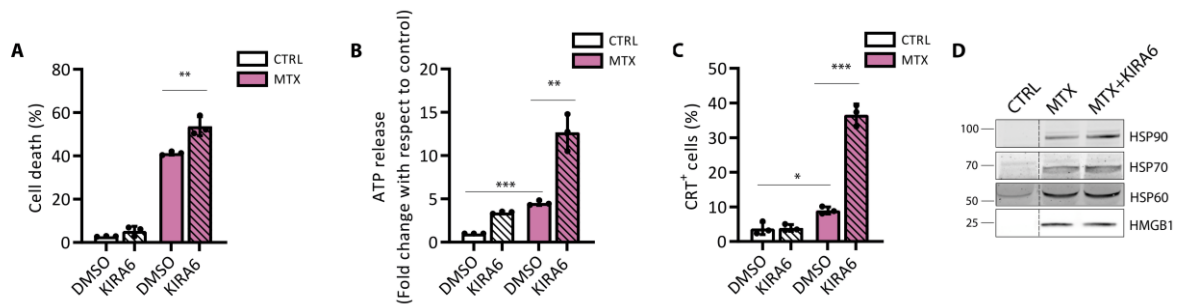

**Supplementary Figure 5** (A) Cell death was assessed in CT26 cells 24 h after treatment with MTX in the presence or absence of KIRA6 (1  $\mu$ M). (B) ATP secretion in the medium of CT26 was measured by luciferase-based assay at the indicated time points after treatment with MTX in the presence or absence of KIRA6 (1  $\mu$ M). (C) CT26 cells treated with MTX in the presence or absence of KIRA6 (1  $\mu$ M) were evaluated for the externalization of CRT in non-permeabilized cells by FACS staining 24 h after treatment. Dead cells were excluded from the analysis. (D) Representative Western Blot of danger signals released in the conditioned medium of CT26 cells 24 h after treatment with MTX in the presence or absence of KIRA6 (1  $\mu$ M). Values are presented as mean  $\pm$  SD of n=3 technical replicates. Data is analyzed by two-tailed Student's t-test, \*p<0.05, \*\*p<0.01, \*\*\*p<0.001.

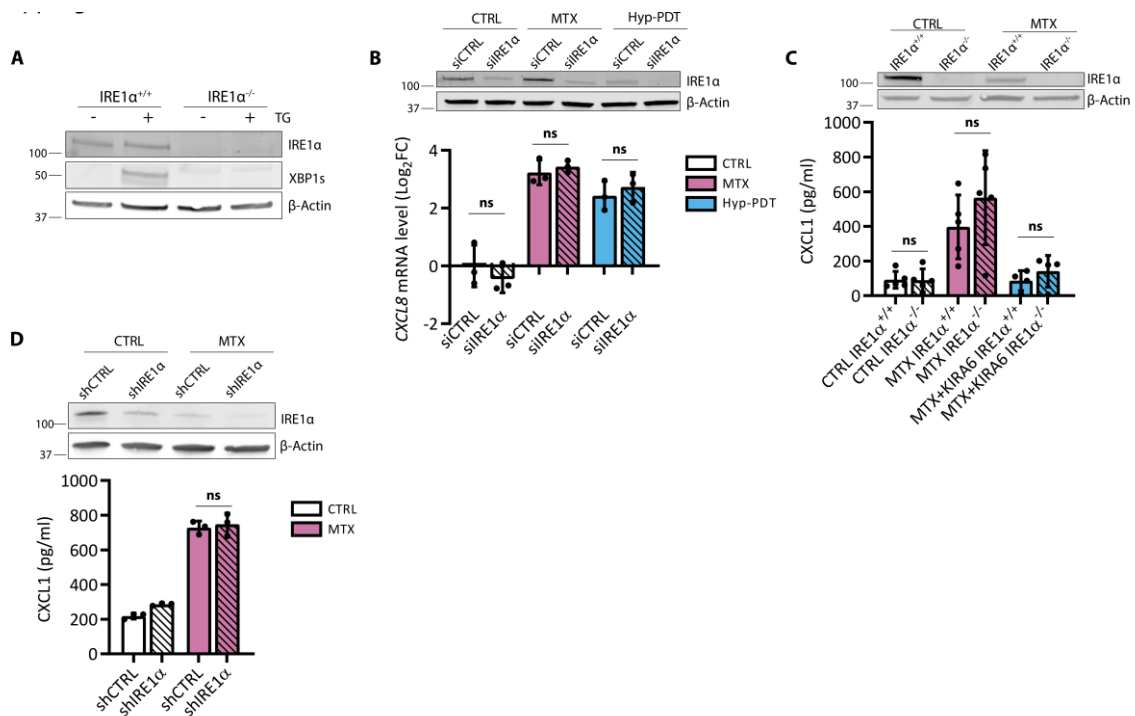

**Supplementary Figure 6** (A) Representative Western Blot showing the ability of thapsigargin (TG, 2  $\mu$ M) to promote the splicing of XBP1 (XBP1s) 8 h after treatment in IRE1 $\alpha$  proficient and deficient A375 cells.  $\beta$ -actin was used as loading control. (B) The levels of CXCL8 mRNA induction were assessed by qPCR in A375 transfected with scrambled siRNA (siCTRL) or with IRE1 $\alpha$  targeting siRNA (siIRE1 $\alpha$ ) in basal condition or 4 h after treatment with MTX or Hyp-PDT. (C) CXCL1 secretion was measured by ELISA in conditioned medium of murine embryonic fibroblasts (MEFs) proficient or deficient for IRE1 $\alpha$  24 h after treatment with MTX (1  $\mu$ M) in the presence or absence of IRE1 $\alpha$  inhibitor KIRA6 (1  $\mu$ M). (D) CXCL1 secretion was measured by ELISA 24 hr after treatment with MTX (5  $\mu$ M) in conditioned medium of murine CT26 cells after short hairpin (sh)-RNA mediated silencing of IRE1 $\alpha$ .

In all graphs values are presented as mean  $\pm$  SD of at least n=3 independent biological replicates and analyzed by two-tailed Student's t-test, ns=not significant.

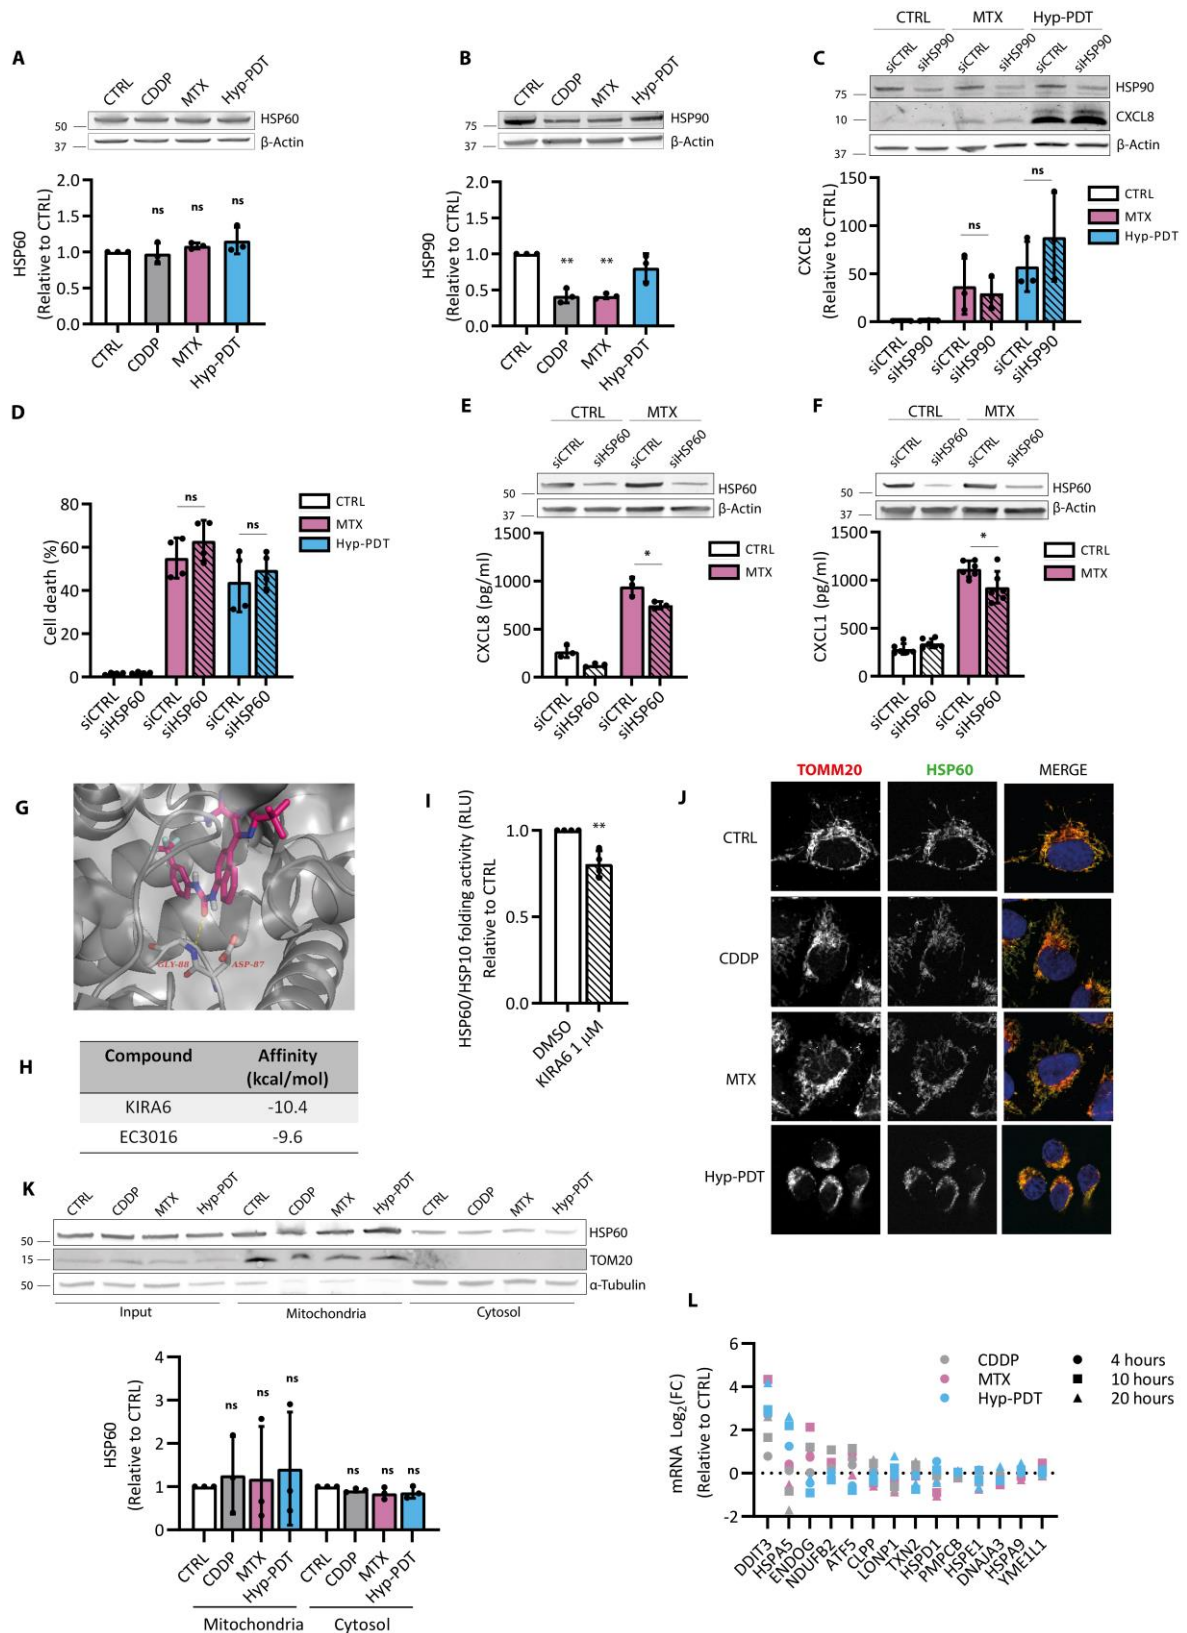

**Supplementary Figure 7 (A-B)** Representative Western Blot and quantification of intracellular HSP60 and HSP90 content in A375 cells in basal conditions and 24 h after treatment with CDDP, MTX, or Hyp-PDT. **(C)** Representative Western Blot and quantification of the impact of HSP90 targeted siRNA (siHSP90) with respect to scramble siRNA (siCTRL) on intracellular CXCL8 accumulation 4 h after treatment with MTX or Hyp-PDT.



Data is expressed as fold change over control incubated with siCTRL. **(D)** Cell death was assessed in A375 cells 24 h after treatment with MTX or Hyp-PDT upon transfection with scramble siCTRL or siHSP6o. **(E)** CXCL8 secretion and **(F)** CXCL1 secretion were measured by ELISA in conditioned medium from HeLa and CT26, respectively, with siRNA mediated HSP6o knock-down 24 h after treatment with MTX. **(G)** Docking simulation shows hydrogen bond interaction between Gly88 of HSP6o and KIRA6 in yellow. **(H)** Binding energy of KIRA6 and EC3o16 on HSP6o as predicted by docking simulation. **(I)** *In vitro* refolding activity of the HSP6o/HSP1o chaperone complex after 1 h of incubation with heat-mediated unfolded substrate proteins in control condition or in the presence of KIRA6 (1o μM). Data is expressed as fold change compared to control. **(J)** Representative confocal microscopy images for the intracellular localization of HSP6o (Green) and TOMM2o (red) in A375 cells 4 h after treatment with CDDP, MTX, or Hyp-PDT. Nuclei were counterstained with DAPI (blue). Scale bar: 1o μm. **(K)** Levels of HSP6o in the cytosol and mitochondria in basal condition or 4 h after treatment with CDDP, MTX, or Hyp-PDT were assessed by Western Blot after subcellular fractionation. TOMM2o was used as mitochondrial marker and α-tubulin was used as cytosolic marker. **(L)** Gene expression obtained from RNAseq data representing the log<sub>2</sub>(fold changes) of genes relative to the induction of mitochondrial UPR upon treatment with CDDP, MTX, or Hyp-PDT compared to time-matched untreated control

In all graphs values are presented as mean ± SD of at least n=3 independent biological replicates. Data is analyzed by one-sample t-test in (A,B,I,K) and two-tailed Student's t-test in (C,D, E, F), \*p<o.05, \*\*p<o.01, ns= not significant.

## Supplementary tables

**Supplementary Table 1. Antibodies**

| Target            | Species | Catalog Number | Company            |
|-------------------|---------|----------------|--------------------|
| CXCL8             | Mouse   | MAB-208        | R&D systems        |
| CXCL3             | Rabbit  | AV07037        | Sigma-Aldrich      |
| $\beta$ -Actin    | Mouse   | A5441          | Sigma-Aldrich      |
| DR5               | Rabbit  | 8074           | Cell Signaling     |
| cJUN              | Rabbit  | 9165           | Cell Signaling     |
| IRE1              | Rabbit  | 3294           | Cell Signaling     |
| pIRE1             | Rabbit  | NB100-2323     | Novus Biologicals  |
| XBP1s             | Mouse   | 647501         | Biologend          |
| HSP60             | Rabbit  | 15282-1-AP     | Proteintech        |
| HSP90             | Mouse   | ADI-SPA-830-F  | Enzo Life sciences |
| TOMM20            | Mouse   | 612278         | BD Biosciences     |
| HMGB1             | Rabbit  | ab18256        | Abcam              |
| pEIF2 $\alpha$    | Rabbit  | 3597           | Cell Signaling     |
| EIF2 $\alpha$     | Mouse   | 2103           | Cell Signaling     |
| ATF4              | Mouse   | 97038          | Cell Signaling     |
| CHOP              | Mouse   | 2895           | Cell Signaling     |
| cFOS              | Rabbit  | 2250           | Cell Signaling     |
| $\alpha$ -Tubulin | Mouse   | T6199          | Sigma-Aldrich      |

|                                               |        |         |                |
|-----------------------------------------------|--------|---------|----------------|
| IKK- $\beta$                                  | Rabbit | 8943    | Abcam          |
| Anti-rabbit AF647                             | Goat   | A-21245 | Thermofisher   |
| Anti-mouse AF647                              | Goat   | A-21235 | Thermofisher   |
| Anti-rabbit AF488                             | Goat   | A-11008 | Thermofisher   |
| Anti-Rabbit IgG (H+L), DyLight 680 Conjugated | Goat   | 35571   | Thermofisher   |
| Anti-Mouse IgG (H+L), DyLight 800 conjugated  | Goat   | 35521   | Thermofisher   |
| Anti-mouse IgG, HRP linked                    | Horse  | 7076    | Cell Signaling |
| Anti-rabbit IgG, HRP linked                   | Goat   | 7074    | Cell Signaling |

**Supplementary Table 2. PCR Primers**

| Gene  | Forward (5' $\rightarrow$ 3') | Reverse (5' $\rightarrow$ 3') |
|-------|-------------------------------|-------------------------------|
| CXCL2 | CCATGGTTAAGAAAATCATCGAAA      | TCCTTCCTTCTGGTCAGTTGGA        |
| CXCL3 | TCCCCATGGTTCAGAAAATC          | CTTCTTACTTCTCTCCTGTCAGTTGGT   |
| CXCL8 | GCAGAGGGTTGTGGAGAAGTTT        | TTGGATACCACAGAGAATGAATTTTT    |
| XBP1S | GGAGTTAAGACAGCGCTTGG          | GTTCTGGAGGGGTGACAAC           |
| 18S   | ATCCCTGAAAAGTTCCAGCA          | CCCTCTGGTGAGGTCAATG           |
